# Supplementary material for: Enterohemorrhagic Escherichia coli Effector Protein EspF Interacts With Host Protein ANXA6 and Triggers Myosin Light Chain Kinase (MLCK)-Dependent Tight Junction Dysregulation
Source: Front Cell Dev Biol. 2020 Dec 23;8:613061. doi: 10.3389/fcell.2020.613061 (PMC7785878; doi:10.3389/fcell.2020.613061)
Supplement: Supplementary Table 1 — Formula of FRET method. [file Table_1.XLSX]

## Sheet: Sheet1
Table S1. Formula of FRET method
Variable	Meaning of variable
a	Donor(CFP) channel image of Donor excited,only Donor dyed (Background correction done)
b	Acceptor(YFP) channel image of Donor excited,only Donor dyed (Background correction done)
c	Acceptor channel image of Donor excited,only Acceptor dyed (Background correction done)
d	Acceptor channel image of Acceptor excited,only Acceptor dyed (Background correction done)
e	Donor channel image of Donor excited, with Donor and Acceptor dyed (Background correction done)
f	Acceptor channel image of Donor excited, with Donor and Acceptor dyed (Background correction done)
g	Acceptor channel image of Acceptor excited, with Donor and Acceptor dyed (Background correction done)
DSBT1	Donor Spectral Bleed-through
ASBT2	Acceptor Spectral Bleed-through
PFRET3	Precision FRET (Correction done FRET image)
Qa	Acceptor quantum yield
Qd	Donor quantum yield
R0	Forster Distance
1 DSBT=
2 ASBT=
3 PFRET=f-DSBT-ASBT
FRET Efficiency=1-
Distance = 1/6
